# Supplementary material for: Identification and genome reconstruction of abundant distinct taxa in microbiomes from one thermophilic and three mesophilic production-scale biogas plants
Source: PubMed Central journal article supplement (PMC4960831; doi:10.1186/s13068-016-0565-3), 2016-07-26

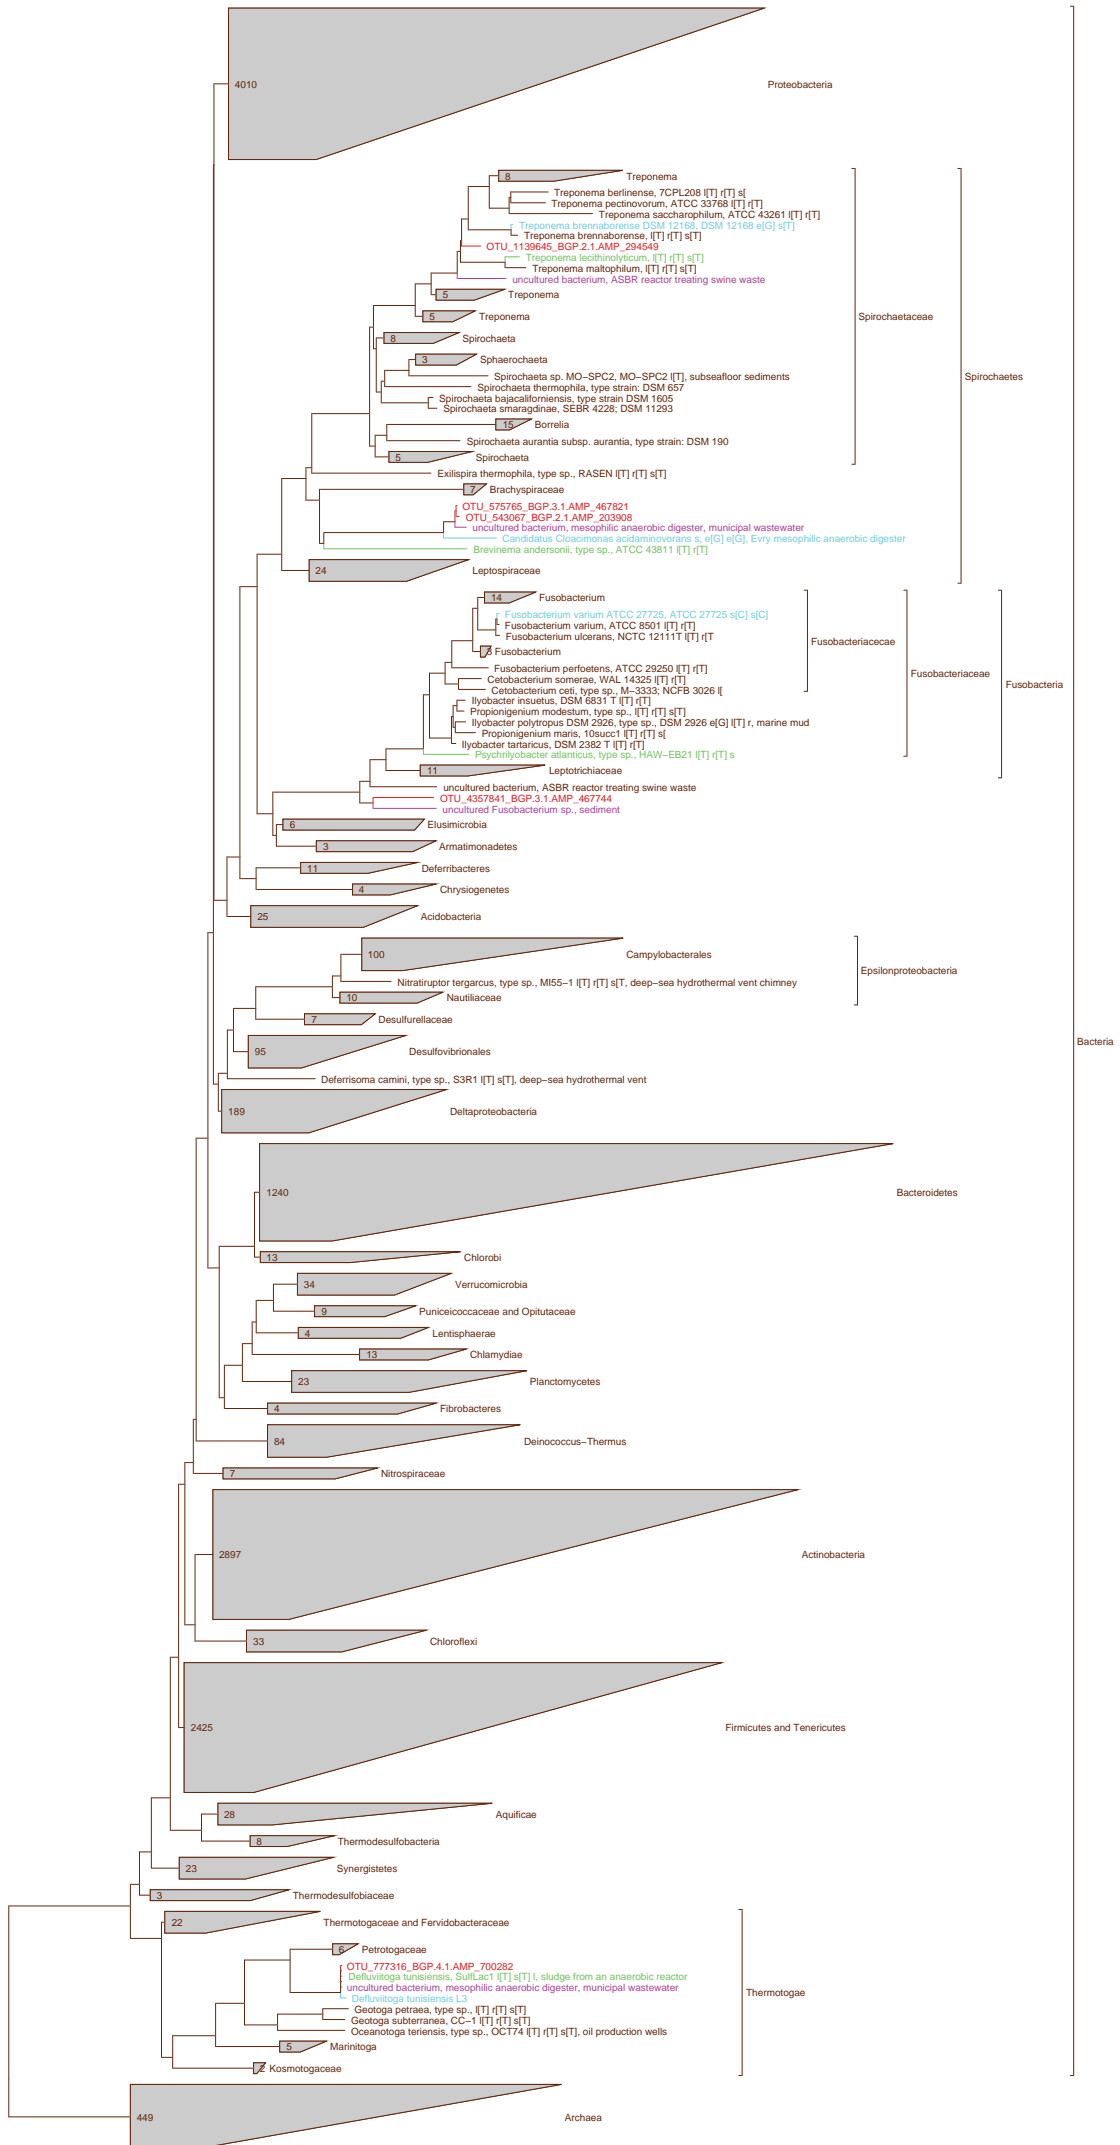

Supplement: 13068_2016_565_MOESM2_ESM.pdf [file 13068_2016_565_MOESM2_ESM.pdf]
