# Supplementary material for: Identification and genome reconstruction of abundant distinct taxa in microbiomes from one thermophilic and three mesophilic production-scale biogas plants
Source: PubMed Central journal article supplement (PMC4960831; doi:10.1186/s13068-016-0565-3), 2016-07-26
Supplement: 13068_2016_565_MOESM4_ESM.pdf [file 13068_2016_565_MOESM4_ESM.pdf]

**Table S1:** Genes encoding proteins involved in energy generation found in the reference genome of *Defluviitoga tunisiensis* L3 [Maus et al., 2016] and presence or absence of these within the *Thermotogae* genome bin.

| Gene name                             | (Putative) gene product                                    | <i>Thermotogae</i> bin |
|---------------------------------------|------------------------------------------------------------|------------------------|
| <b>Glucose fermentation</b>           |                                                            |                        |
| <i>xylEFK</i> <sup>1</sup>            | glucose/xylose transporter                                 | Present                |
| <i>glk</i>                            | glucokinase (EC: 2.7.1.2)                                  | Present                |
| <i>pgi</i>                            | phosphoglucose isomerase (EC: 5.3.1.9)                     | Present                |
| <i>pfk</i>                            | Phosphofructokinase (EC: 2.7.1.11)                         | Present                |
| <i>fba</i>                            | fructose bisphosphate aldolase (EC: 4.2.1.13)              | Present                |
| <i>tpi</i>                            | triosephosphate isomerase (EC: 5.3.1.1)                    | Absent                 |
| <i>gap</i>                            | glyceraldehyde 3-phosphate dehydrogenase (EC: 1.2.1.12)    | Present                |
| <i>pgk</i>                            | phosphoglycerate kinase (EC: 2.7.2.3)                      | Present                |
| <i>pgm</i>                            | phosphoglucomutase (EC: 5.4.2.1)                           | Present                |
| <i>eno</i>                            | enolase (EC: 4.2.1.11)                                     | Present                |
| <i>pyk</i>                            | pyruvate kinase (EC: 2.7.1.40)                             | Present                |
| <b>Hexoses fermentation</b>           |                                                            |                        |
| <i>tkt</i>                            | transketolase (EC: 2.2.1.1)                                | Absent                 |
| <i>rpi</i>                            | Ribose 5-phosphate isomerase (EC: 5.3.1.6)                 | Absent                 |
| <i>rpe</i>                            | ribulose-phosphate 3-epimerase (EC: 5.1.3.1)               | Present                |
| <i>melA</i> <sup>2</sup>              | alpha galactosidase (EC: 3.2.1.22)                         | Absent                 |
| <i>scrK</i>                           | fructokinase (EC: 2.7.1.4)                                 | Absent                 |
| <b>Lactose fermentation</b>           |                                                            |                        |
| <i>malEFG</i> <sup>3</sup>            | maltose/oligosaccharide transporter                        | Present                |
| <i>lacA</i>                           | beta-galactosidase (EC: 3.2.1.23)                          | Present                |
| <i>galK</i>                           | galactokinase (EC: 2.7.1.6)                                | Present                |
| <i>galT</i>                           | galactose-1-phosphate uridylyltransferase (EC: 2.7.7.12)   | Present                |
| <i>galE</i>                           | UDP-glucose 4-epimerase (EC: 5.1.3.2)                      | Present                |
| <b>Galactan fermentation</b>          |                                                            |                        |
| <i>ganA</i>                           | arabinogalactan endo-1,4-beta-galactosidase (EC: 3.2.1.89) | Absent                 |
| <b>Stachyose fermentation</b>         |                                                            |                        |
| <i>melZ</i>                           | alpha-glucosidase (EC: 3.2.1.20)                           | Absent                 |
| <b>Glycogen/Pullulan fermentation</b> |                                                            |                        |
| <i>pulA</i>                           | pullanase (EC: 3.2.1.41)                                   | Present                |
| <i>amyA</i>                           | alpha amylase (extracellular) (EC: 3.2.1.1)                | Present                |
| <i>amyB</i>                           | alpha amylase (cytoplasmic) (EC: 3.2.1.1)                  | Present                |

| <b>Mannosides fermentation</b>           |                                                                  |         |
|------------------------------------------|------------------------------------------------------------------|---------|
| <i>mtpEFGKL</i>                          | Mannosides transporter                                           | Present |
| <i>manC</i>                              | glycosylase (GH32)                                               | Present |
| <i>manAoppABCDE</i>                      | mannose-6-phosphate isomerase (EC: 5.3.1.8)                      | Present |
| <b>Trehalose fermentation</b>            |                                                                  |         |
| <i>treS</i>                              | trehalose synthase (EC: 5.4.99.16)                               | Absent  |
| <b>Lichenan fermentation</b>             |                                                                  |         |
| <i>dpp/oppABCDE<sup>4</sup></i>          | lichenan transporter                                             | Absent  |
| <i>licB</i>                              | licheninase (EC: 3.2.1.73)                                       | Absent  |
| <i>bgIB</i>                              | thermostable beta-glucosidase (EC: 3.2.1.21)                     | Absent  |
| <b>Cellulose fermentation</b>            |                                                                  |         |
| <i>dpp/oppABCDF<sup>4</sup></i>          | cellobiose transporter                                           | Absent  |
| <i>cel5A</i>                             | endo-1,4-beta-D-glucanase (EC: 3.2.1.4)                          | Absent  |
| <i>cbh1</i>                              | cellulose 1,4-beta-cellobiosidase (EC: 3.2.1.91)                 | Absent  |
| <i>bgIA</i>                              | cytosolic beta-glucosidase (EC: 3.2.1.21)                        | Absent  |
| <b>Chitin fermentation</b>               |                                                                  |         |
| <i>chiEFG</i>                            | chitinobiose transporter                                         | Absent  |
| <i>chiA</i>                              | chitinase (EC: 3.2.1.14)                                         | Absent  |
| <i>nagZ</i>                              | beta-N-acetylhexosaminidase (EC: 3.2.1.52)                       | Absent  |
| <i>nagA</i>                              | N-acetylglucosamine-6-phosphate deacetylase (EC: 3.5.1.25)       | Absent  |
| <i>nagB</i>                              | glucosamine-fructose-6-phosphate aminotransferase (EC: 2.6.1.16) | Absent  |
| <b>Oligo galacturonates fermentation</b> |                                                                  |         |
| <i>aguEFG</i>                            | oligo galacturonates transporter                                 | Present |
| <i>aguA</i>                              | alpha-glycosidase (EC: 3.2.1.20)                                 | Absent  |
| <i>uxaC</i>                              | glucuronate isomerase (EC: 5.3.1.19)                             | Absent  |
| <i>uxuB</i>                              | D-mannonate oxidoreductase (EC: 1.1.1.57)                        | Present |
| <i>uxuA</i>                              | mannonate dehydratase (EC: 4.2.1.8)                              | Absent  |
| <i>kdgK</i>                              | 2-keto-3-deoxygluconate kinase (EC: 2.7.1.178)                   | Present |
| <b>Xylan fermentation</b>                |                                                                  |         |
| <i>xtpELKGF</i>                          | xylan oligosaccharides transporter                               | Absent  |
| <i>xloELKGF</i>                          | xylan oligosaccharides transporter                               | Absent  |
| <i>xynA</i>                              | beta-xylosidase (EC: 3.2.1.8)                                    | Present |
| <i>bxIB</i>                              | beta-xylosidase (EC: 3.2.1.37)                                   | Absent  |
| <b>Xylose fermentation</b>               |                                                                  |         |
| <i>xylA</i>                              | xylose isomerase (EC: 5.3.1.5)                                   | Present |
| <i>xylB</i>                              | xylulokinase (EC: 2.7.1.17)                                      | Present |
| <b>Arabinosides fermentation</b>         |                                                                  |         |

|                              |                                                                                                                     |         |
|------------------------------|---------------------------------------------------------------------------------------------------------------------|---------|
| <i>araEFG</i>                | arabinosides transporter                                                                                            | Present |
| <i>abfA</i>                  | alpha-L-arabinofuranosidase (EC: 3.2.1.55)                                                                          | Present |
| <i>araA</i>                  | L-arabinose isomerase (EC: 5.3.1.4)                                                                                 | Absent  |
| <i>araB</i>                  | ribulokinase (EC: 2.7.1.16)                                                                                         | Present |
| <i>araD</i>                  | L-ribulose-5-phosphate 4-epimerase (EC: 5.1.3.4)                                                                    | Present |
| <i>araM</i>                  | aldose 1-epimerase (EC: 5.1.3.3)                                                                                    | Present |
| <b>Pyruvate metabolism</b>   |                                                                                                                     |         |
| <i>porABCD</i> <sup>5</sup>  | pyruvate ferredoxin oxidoreductase (EC: 1.2.7.1)                                                                    | Present |
| <i>ack</i>                   | acetate/propionate kinase (EC: 2.7.2.15)                                                                            | Present |
| <i>ldh</i>                   | lactate dehydrogenase (EC: 1.1.1.27)                                                                                | Present |
| <i>adh</i>                   | alcohol dehydrogenase (EC: 1.1.1.2)                                                                                 | Present |
| <b>Incomplete TCA cycle</b>  |                                                                                                                     |         |
| <i>idh</i>                   | isocitrate dehydrogenase (EC: 1.1.1.41)                                                                             | Present |
| <i>korAB</i>                 | 2-oxoglutarate oxidoreductase (EC: 1.2.7.3)                                                                         | Present |
| <i>fumA</i>                  | fumarate hydratase (EC: 4.2.1.2)                                                                                    | Present |
| <b>Hydrogen production</b>   |                                                                                                                     |         |
| <i>hydABG</i>                | [Fe-Fe] hydrogenase (EC: 1.12.1.4)                                                                                  | Present |
| <b>Propionate metabolism</b> |                                                                                                                     |         |
| <i>mcm</i>                   | methylmalonyl-CoA mutase (EC: 5.4.99.2)                                                                             | Present |
| <i>mmc</i>                   | methylmalonyl-coA carboxytransferase (EC: 2.1.3.1)                                                                  | Present |
| <i>mmcE</i>                  | methylmalonyl-coA epimerase (EC: 5.1.99.1)                                                                          | Present |
| <i>pduL</i>                  | phosphate propanoyltransferase (EC: 2.3.1.222)                                                                      | Present |
| <i>tdcD</i>                  | propionate kinase/acetate kinase (EC: 2.7.2.15)                                                                     | Present |
| <b>Miscellaneous</b>         |                                                                                                                     |         |
| <i>rbsK</i>                  | ribokinase (EC: 2.7.1.15)                                                                                           | Present |
| <i>zwf</i>                   | glucose-6-phosphate 1-dehydrogenase (EC: 1.1.1.49)                                                                  | Present |
| <i>pgl</i>                   | 6-phosphogluconolactonase (EC: 3.1.1.31)                                                                            | Absent  |
| <i>gnd</i>                   | 6-phosphogluconate dehydrogenase (EC: 1.1.1.44)                                                                     | Present |
| <i>glmM</i>                  | phosphoglucosamine mutase (EC: 5.4.2.10)                                                                            | Present |
| <i>glmU</i> <sup>6</sup>     | N-acetylglucosamine-1-phosphate<br>uridylyltransferase/glucosamine-1-phosphate<br>acetyltransferase (EC: 2.3.1.157) | Present |

1 the transport system XyleFK was showed to import glucose and xylose.

2 the gene *melA* was predicted to encode multifunctional alpha galactosidase (3.2.1.22).

3 the substrate binding protein MalE of the transport system MalEFG was described to bind different carbohydrates. Therefore, differed sugars are predicted to be imported *via* the MalEFG transport system.

4 predicted genes encoding not further characterized Dpp/Opp family transport system proposed to be responsible for the import of the several carbohydrates including  $\beta$  - glucosides and cellobiose.

5 the gene encoding the PorABCD enzyme was shown to possess a dual function.

6 the gene *glmU* was predicted to encode bifunctional enzyme.
