# Supplementary material for: Identification and genome reconstruction of abundant distinct taxa in microbiomes from one thermophilic and three mesophilic production-scale biogas plants
Source: PubMed Central journal article supplement (PMC4960831; doi:10.1186/s13068-016-0565-3), 2016-07-26
Supplement: 13068_2016_565_MOESM5_ESM.pdf [file 13068_2016_565_MOESM5_ESM.pdf]

**Table S2:** Genes encoding proteins involved in Life in the presence of oxygen, Anaerobic lifestyle and energy generation found in the reference genome of *Candidatus Cloacamonas acidaminovorans* [Pelletier et al. (2008)] and presence or absence of these within the *Cloacimonetes* genome bin.

| Gene name                             | Encoded protein                                                                    | <i>Cloacimonetes</i> bin |
|---------------------------------------|------------------------------------------------------------------------------------|--------------------------|
| <b>Life in the presence of oxygen</b> |                                                                                    |                          |
| <i>dfx</i>                            | Superoxide reductase (EC: 1.15.1.2)                                                | Present                  |
| <i>rbr</i>                            | Ruberythrin (EC: 1.11.1.1)                                                         | Present                  |
| <i>rub</i>                            | Rubredoxin                                                                         | Present                  |
| <i>ahpC</i>                           | Peroxiredoxin (EC: 1.11.1.15)                                                      | Present                  |
| <i>trx</i>                            | (thiol reductase) Thioredoxin                                                      | Present                  |
| <i>trxB</i>                           | Thioredoxin reductase (EC: 1.8.1.9)                                                | Present                  |
| <i>fprA</i>                           | Rubredoxin-oxygen oxidoreductase (EC: 1.15.1.2)                                    | Present                  |
| Cloam0913 <sup>1</sup>                | Class II ribonucleotide reductase (putative)                                       | Present                  |
| <b>Anaerobic lifestyle</b>            |                                                                                    |                          |
| <i>nrdD</i>                           | Class III ribonucleotide reductase (EC: 1.17.4.2)                                  | Present                  |
| <i>nrdG</i>                           | Class III ribonucleotide reductase-activating enzyme (EC: 1.97.1.-)                | Present                  |
| <i>por</i>                            | Pyruvate ferredoxin oxidoreductase (EC: 1.2.7.1)                                   | Present                  |
| <i>korC</i>                           | 2-Ketoglutarate ferredoxin oxidoreductase $\gamma$ -subunit (EC: 1.2.7.3)          | Present                  |
| <i>korB</i>                           | 2-Ketoglutarate ferredoxin oxidoreductase $\beta$ -subunit (EC: 1.2.7.3)           | Present                  |
| <i>korA</i>                           | 2-Ketoglutarate ferredoxin oxidoreductase $\alpha$ -subunit (EC: 1.2.7.3)          | Present                  |
| <i>korD</i>                           | 2-Ketoglutarate ferredoxin oxidoreductase $\delta$ -subunit (EC: 1.2.7.3)          | Present                  |
| <i>aorB</i>                           | Aldehyde ferredoxin oxidoreductase, tungsten containing (EC: 1.2.7.5)              | Present                  |
| <i>aorA</i>                           | Aldehyde ferredoxin oxidoreductase, tungsten containing (EC: 1.2.99.6)             | Present                  |
| <i>vorD</i>                           | Branched-chain ketoacid ferredoxin oxidoreductase $\delta$ -subunit (EC: 1.2.99.5) | Present                  |

|                        |                                                                                    |         |
|------------------------|------------------------------------------------------------------------------------|---------|
| <i>vorC</i>            | Branched-chain ketoacid ferredoxin oxidoreductase $\gamma$ -subunit (EC: 1.2.99.5) | Present |
| <i>vorB</i>            | Branched-chain ketoacid ferredoxin oxidoreductase $\beta$ -subunit (EC: 1.2.99.5)  | Present |
| <i>vorA</i>            | Branched-chain ketoacid ferredoxin oxidoreductase $\alpha$ -subunit (EC: 1.2.99.5) | Present |
| <i>iorB</i>            | Indolepyruvate ferredoxin oxidoreductase (EC: 1.2.7.8)                             | Present |
| <i>iorA</i>            | Indolepyruvate ferredoxin oxidoreductase (EC: 1.2.7.8)                             | Present |
| <b>Energy</b>          |                                                                                    |         |
| <i>hymC</i>            | Fe-only hydrogenase $\alpha$ -subunit (EC: 1.12.7.2)                               | Present |
| <i>hymB</i>            | Fe-only hydrogenase $\beta$ -subunit (EC: 1.12.7.2)                                | Present |
| <i>hymA</i>            | Fe-only hydrogenase $\gamma$ -subunit (EC: 1.12.7.2)                               | Present |
| <i>hydEF</i>           | Fe-only hydrogenase, assembly protein                                              | Present |
| <i>hydG</i>            | Fe-only hydrogenase, assembly protein                                              | Present |
| Cloam1768 <sup>1</sup> | Methylmalonyl-CoA-decarboxylase (putative) $\alpha$ -subunit (EC: 4.1.1.41)        | Present |
| Cloam1770 <sup>1</sup> | Methylmalonyl-CoA-decarboxylase (putative) $\gamma$ -subunit (EC: 4.1.1.41)        | Present |
| Cloam1771 <sup>1</sup> | Methylmalonyl-CoA-decarboxylase (putative) $\beta$ -subunit (EC: 4.1.1.41)         | Present |
| Cloam1052 <sup>1</sup> | ATP synthase, subunit A1 (EC: 3.6.3.15)                                            | Present |
| Cloam1053 <sup>1</sup> | ATP synthase, subunit B1 (EC: 3.6.3.15)                                            | Present |
| Cloam1054 <sup>1</sup> | ATP synthase, subunit D                                                            | Present |
| Cloam1055 <sup>1</sup> | ATP synthase, subunit I, putative (EC: 3.6.3.14)                                   | Present |
| Cloam1056 <sup>1</sup> | ATP synthase, subunit K, putative                                                  | Present |
| <i>hppA</i>            | Pyrophosphate-energised proton pump (EC: 3.6.1.1)                                  | Present |

<sup>1</sup> Name of genetic determinant in *Candidatus* Cloacamonas acidaminovorans genome, no other name given.
